# Supplementary material
Source: PubMed Central journal article supplement (PMC6821425)
Supplement: btz221_supplementary_information.pdf [file btz221_supplementary_information.pdf]

# Supplementary Information for Kinpute

Mark Abney and Aisha El Sherbiny

Department of Human Genetics, University of Chicago

# Contents

|   |                            |   |
|---|----------------------------|---|
| 1 | Additional quality metrics | 4 |
|---|----------------------------|---|

## List of Tables

|    |                                                                                                                                                                                                                                                                                                                                                                                                                                                                                                                    |    |
|----|--------------------------------------------------------------------------------------------------------------------------------------------------------------------------------------------------------------------------------------------------------------------------------------------------------------------------------------------------------------------------------------------------------------------------------------------------------------------------------------------------------------------|----|
| 1  | Genotype error model, $\Pr(O_i G_i)$                                                                                                                                                                                                                                                                                                                                                                                                                                                                               | 6  |
| 2  | $\Pr(G_u S_{iu} = k)$                                                                                                                                                                                                                                                                                                                                                                                                                                                                                              | 6  |
| 3  | $\Pr(G_i G_u, S_{iu} = k)$                                                                                                                                                                                                                                                                                                                                                                                                                                                                                         | 6  |
| 4  | Informative 3-way configurations. Note that because individuals 1 and 2 are unordered, we list only one of the corresponding ordered 3-way configurations (e.g. configuration (8, 9, 8) is also informative but has the same probabilities as configuration (9, 8, 8) with individuals 1 and 2 switched). Note that for configuration (8, 8, 7), (7, 7, 7) and (3, 3, 7) $\Pr(G_1, G_2 G_u, S_{u12}) = \Pr(G_1 G_u, S_{u1}) = \Pr(G_2 G_u, S_{u2})$ , though we do not seek these configurations in our algorithm. | 7  |
| 5  | Configuration ( $S_{u1} = 9, S_{u2} = 8, S_{12} = 8$ ), probabilities $\Pr(G_1, G_2 G_u, S_{u12})$                                                                                                                                                                                                                                                                                                                                                                                                                 | 7  |
| 6  | Configuration ( $S_{u1} = 8, S_{u2} = 8, S_{12} = 9$ ), probabilities $\Pr(G_1, G_2 G_u, S_{u12})$                                                                                                                                                                                                                                                                                                                                                                                                                 | 7  |
| 7  | Configuration ( $S_{u1} = 8, S_{u2} = 8, S_{12} = 8$ ), probabilities $\Pr(G_1, G_2 G_u, S_{u12})$                                                                                                                                                                                                                                                                                                                                                                                                                 | 8  |
| 8  | Configuration ( $S_{u1} = 8, S_{u2} = 6, S_{12} = 5$ ), probabilities $\Pr(G_1, G_2 G_u, S_{u12})$                                                                                                                                                                                                                                                                                                                                                                                                                 | 8  |
| 9  | Configuration ( $S_{u1} = 8, S_{u2} = 5, S_{12} = 6$ ), probabilities $\Pr(G_1, G_2 G_u, S_{u12})$                                                                                                                                                                                                                                                                                                                                                                                                                 | 8  |
| 10 | Configuration ( $S_{u1} = 8, S_{u2} = 5, S_{12} = 5$ ), probabilities $\Pr(G_1, G_2 G_u, S_{u12})$                                                                                                                                                                                                                                                                                                                                                                                                                 | 9  |
| 11 | Configuration ( $S_{u1} = 5, S_{u2} = 5, S_{12} = 2$ ), probabilities $\Pr(G_1, G_2 G_u, S_{u12})$                                                                                                                                                                                                                                                                                                                                                                                                                 | 9  |
| 12 | Configuration ( $S_{u1} = 4, S_{u2} = 3, S_{12} = 8$ ), probabilities $\Pr(G_1, G_2 G_u, S_{u12})$                                                                                                                                                                                                                                                                                                                                                                                                                 | 9  |
| 13 | Configuration ( $S_{u1} = 3, S_{u2} = 2, S_{12} = 5$ ), probabilities $\Pr(G_1, G_2 G_u, S_{u12})$                                                                                                                                                                                                                                                                                                                                                                                                                 | 10 |
| 14 | Heterozygote sensitivity                                                                                                                                                                                                                                                                                                                                                                                                                                                                                           | 10 |
| 15 | Heterozygote positive predictive value                                                                                                                                                                                                                                                                                                                                                                                                                                                                             | 11 |
| 16 | Concordance rates                                                                                                                                                                                                                                                                                                                                                                                                                                                                                                  | 12 |

## List of Figures

- 1 The nine condensed identity states  $S_{AB}$ . A line joining two alleles indicates those alleles are IBD. . . . . 5

# 1 Additional quality metrics

In addition to  $R^2$ , we computed other measures on how much Kinpute improves the imputation quality of LD-based methods. In all measures we compare the imputed genotypes (both from Impute2 and from Kinpute) to the true genotypes on the 48 held out individuals. Genotypes were compared only for chromosome 22. The additional measures are, concordance, heterozygote sensitivity (i.e. recall), and heterozygote positive predictive value (i.e. precision). Each of these measures require hard genotype calls, which were done at a genotype probability threshold of 0.9, (i.e. genotypes classified as having “high” certainty) or by picking the genotype with the maximum probability (i.e. for genotypes classified as having “low” certainty). The concordance is defined as the frequency that the called genotype is the same as the true genotype. Heterozygote sensitivity is the fraction of true heterozygotes that are called as heterozygotes. The heterozygote positive predictive value is the fraction of called heterozygotes that are true heterozygotes. Results are shown in Tables 14 – 16.

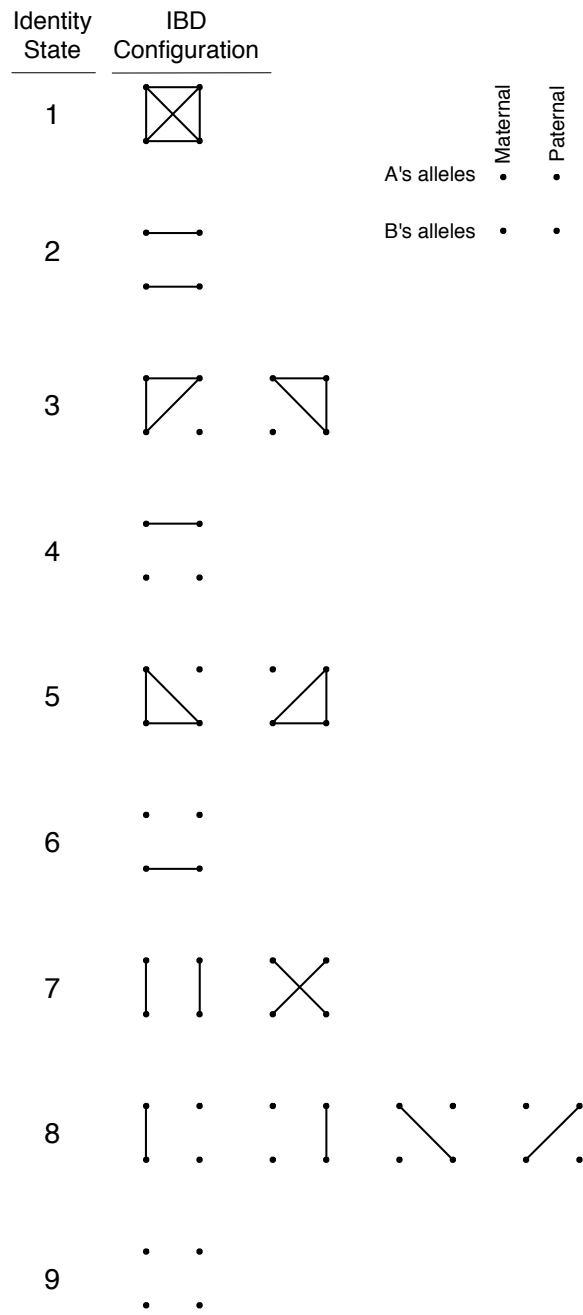

Figure 1: The nine condensed identity states  $S_{AB}$ . A line joining two alleles indicates those alleles are IBD.

| $G_i$ | $O_i$                    |                               |                          |
|-------|--------------------------|-------------------------------|--------------------------|
|       | 0                        | 1                             | 2                        |
| 0     | $(1 - \epsilon)^2$       | $2\epsilon(1 - \epsilon)$     | $\epsilon^2$             |
| 1     | $\epsilon(1 - \epsilon)$ | $1 - 2\epsilon(1 - \epsilon)$ | $\epsilon(1 - \epsilon)$ |
| 2     | $\epsilon^2$             | $2\epsilon(1 - \epsilon)$     | $(1 - \epsilon)^2$       |

Table 1: Genotype error model,  $\Pr(O_i|G_i)$

| $k$     | $G_u$       |             |       |
|---------|-------------|-------------|-------|
|         | 0           | 1           | 2     |
| 1, 2    | $(1 - p)$   | 0           | $p$   |
| 3, 4    | $(1 - p)^2$ | $2p(1 - p)$ | $p^2$ |
| 5, 6    | $(1 - p)$   | 0           | $p$   |
| 7, 8, 9 | $(1 - p)^2$ | $2p(1 - p)$ | $p^2$ |

Table 2:  $\Pr(G_u|S_{iu} = k)$

| $G_u$        | $G_i$   | 0           | 1           | 2     |
|--------------|---------|-------------|-------------|-------|
|              |         | 0           | 1           | 2     |
| $S_{iu} = 9$ | 0, 1, 2 | $(1 - p)^2$ | $2p(1 - p)$ | $p^2$ |
|              | 0       | $1 - p$     | $p$         | 0     |
|              | 1       | $(1 - p)/2$ | $1/2$       | $p/2$ |
| $S_{iu} = 8$ | 2       | 0           | $1 - p$     | $p$   |
|              | 0       | 1           | 0           | 0     |
|              | 1       | 0           | 1           | 0     |
| $S_{iu} = 7$ | 2       | 0           | 0           | 1     |
|              | 0, 2    | $(1 - p)^2$ | $2p(1 - p)$ | $p^2$ |
|              | 1       | 0           | 0           | 0     |
| $S_{iu} = 6$ | 0       | $1 - p$     | $p$         | 0     |
|              | 1       | 0           | 0           | 0     |
|              | 2       | 0           | $1 - p$     | $p$   |
| $S_{iu} = 5$ | 0, 1, 2 | $1 - p$     | 0           | $p$   |
|              | 0       | 1           | 0           | 0     |
|              | 1       | $1/2$       | 0           | $1/2$ |
| $S_{iu} = 4$ | 2       | 0           | 0           | 1     |
|              | 0, 2    | $1 - p$     | 0           | $p$   |
|              | 1       | 0           | 0           | 0     |
| $S_{iu} = 3$ | 0       | 1           | 0           | 0     |
|              | 1       | $1/2$       | 0           | $1/2$ |
|              | 2       | 0           | 0           | 1     |
| $S_{iu} = 2$ | 0, 2    | $1 - p$     | 0           | $p$   |
|              | 1       | 0           | 0           | 0     |
|              | 0       | 1           | 0           | 0     |
| $S_{iu} = 1$ | 1       | 0           | 1           | 0     |
|              | 2       | 0           | 0           | 1     |
|              | 0       | 1           | 0           | 0     |

Table 3:  $\Pr(G_i|G_u, S_{iu} = k)$

| $S_{u1}$ | $S_{u2}$ | $S_{12}$ |
|----------|----------|----------|
| 9        | 8        | 8        |
| 8        | 8        | 9        |
| 8        | 8        | 8        |
| 8        | 6        | 5        |
| 8        | 5        | 6        |
| 8        | 5        | 5        |
| 5        | 5        | 2        |
| 4        | 3        | 8        |
| 3        | 2        | 5        |

Table 4: Informative 3-way configurations. Note that because individuals 1 and 2 are unordered, we list only one of the corresponding ordered 3-way configurations (e.g. configuration (8, 9, 8) is also informative but has the same probabilities as configuration (9, 8, 8) with individuals 1 and 2 switched). Note that for configuration (8, 8, 7), (7, 7, 7) and (3, 3, 7)  $\Pr(G_1, G_2|G_u, S_{u12}) = \Pr(G_1|G_u, S_{u1}) = \Pr(G_2|G_u, S_{u2})$ , though we do not seek these configurations in our algorithm.

|           |   | $G_2$ |         |         |         |
|-----------|---|-------|---------|---------|---------|
|           |   | $G_1$ | 0       | 1       | 2       |
| $G_u = 0$ | 0 | 0     | $q^2$   | 0       | 0       |
|           | 1 | 0     | $pq$    | $pq$    | 0       |
|           | 2 | 0     | 0       | $p^2$   | 0       |
| $G_u = 1$ | 0 | 0     | $q^2/2$ | $q^2/2$ | 0       |
|           | 1 | 0     | $qp/2$  | $qp$    | $qp/2$  |
|           | 2 | 0     | 0       | $p^2/2$ | $p^2/2$ |
| $G_u = 2$ | 0 | 0     | 0       | $q^2$   | 0       |
|           | 1 | 0     | 0       | $pq$    | $pq$    |
|           | 2 | 0     | 0       | 0       | $p^2$   |

Table 5: Configuration ( $S_{u1} = 9, S_{u2} = 8, S_{12} = 8$ ), probabilities  $\Pr(G_1, G_2|G_u, S_{u12})$

|           |   | $G_2$ |         |         |         |
|-----------|---|-------|---------|---------|---------|
|           |   | $G_1$ | 0       | 1       | 2       |
| $G_u = 0$ | 0 | 0     | $q^2$   | $pq$    | 0       |
|           | 1 | 0     | $pq$    | $p^2$   | 0       |
|           | 2 | 0     | 0       | 0       | 0       |
| $G_u = 1$ | 0 | 0     | 0       | $q^2/2$ | $pq/2$  |
|           | 1 | 0     | $q^2/2$ | $pq$    | $p^2/2$ |
|           | 2 | 0     | $pq/2$  | $p^2/2$ | 0       |
| $G_u = 2$ | 0 | 0     | 0       | 0       | 0       |
|           | 1 | 0     | 0       | $q^2$   | $pq$    |
|           | 2 | 0     | 0       | $pq$    | $p^2$   |

Table 6: Configuration ( $S_{u1} = 8, S_{u2} = 8, S_{12} = 9$ ), probabilities  $\Pr(G_1, G_2|G_u, S_{u12})$

|           |   | $G_2$      |               |            |
|-----------|---|------------|---------------|------------|
|           |   | 0          | 1             | 2          |
| $G_u = 0$ | 0 | $q(q+1)/2$ | $pq/2$        | 0          |
|           | 1 | $pq/2$     | $p(p+1)/2$    | 0          |
|           | 2 | 0          | 0             | 0          |
| $G_u = 1$ | 0 | $q^2/4$    | $q(p+1)/4$    | 0          |
|           | 1 | $q(p+1)/4$ | $(p^2+q^2)/4$ | $p(q+1)/4$ |
|           | 2 | 0          | $p(q+1)/4$    | $p^2/4$    |
| $G_u = 2$ | 0 | 0          | 0             | 0          |
|           | 1 | 0          | $q(q+1)/2$    | $pq/2$     |
|           | 2 | 0          | $pq/2$        | $p(p+1)/2$ |

Table 7: Configuration ( $S_{u1} = 8, S_{u2} = 8, S_{12} = 8$ ), probabilities  $\Pr(G_1, G_2 | G_u, S_{u12})$

|           |   | $G_2$ |   |       |
|-----------|---|-------|---|-------|
|           |   | 0     | 1 | 2     |
| $G_u = 0$ | 0 | $q$   | 0 | 0     |
|           | 1 | 0     | 0 | $p$   |
|           | 2 | 0     | 0 | 0     |
| $G_u = 1$ | 0 | $q/2$ | 0 | 0     |
|           | 1 | $q/2$ | 0 | $p/2$ |
|           | 2 | 0     | 0 | $p/2$ |
| $G_u = 2$ | 0 | 0     | 0 | 0     |
|           | 1 | $q$   | 0 | 0     |
|           | 2 | 0     | 0 | $p$   |

Table 8: Configuration ( $S_{u1} = 8, S_{u2} = 6, S_{12} = 5$ ), probabilities  $\Pr(G_1, G_2 | G_u, S_{u12})$

|           |   | $G_2$ |   |       |
|-----------|---|-------|---|-------|
|           |   | 0     | 1 | 2     |
| $G_u = 0$ | 0 | $q$   | 0 | 0     |
|           | 1 | $p$   | 0 | 0     |
|           | 2 | 0     | 0 | 0     |
| $G_u = 1$ | 0 | 0     | 0 | $q/2$ |
|           | 1 | $q/2$ | 0 | $p/2$ |
|           | 2 | $p/2$ | 0 | 0     |
| $G_u = 2$ | 0 | 0     | 0 | 0     |
|           | 1 | 0     | 0 | $q$   |
|           | 2 | 0     | 0 | $p$   |

Table 9: Configuration ( $S_{u1} = 8, S_{u2} = 5, S_{12} = 6$ ), probabilities  $\Pr(G_1, G_2 | G_u, S_{u12})$



|           |       | $G_2$ |       |       |
|-----------|-------|-------|-------|-------|
|           |       | 0     | 1     | 2     |
| $G_u = 0$ | $G_1$ | 0     | $q$   | 0     |
|           | 0     | $q$   | 0     | 0     |
|           | 1     | $p$   | 0     | 0     |
| $G_u = 1$ | $G_1$ | 0     | $q/2$ | 0     |
|           | 0     | $q/2$ | 0     | 0     |
|           | 1     | $p/2$ | 0     | $q/2$ |
| $G_u = 2$ | $G_1$ | 0     | 0     | 0     |
|           | 0     | 0     | 0     | 0     |
|           | 1     | 0     | 0     | $q$   |
|           | 2     | 0     | 0     | $p$   |

Table 10: Configuration  $(S_{u1} = 8, S_{u2} = 5, S_{12} = 5)$ , probabilities  $\Pr(G_1, G_2|G_u, S_{u12})$

|           |       | $G_2$ |   |       |
|-----------|-------|-------|---|-------|
|           |       | 0     | 1 | 2     |
| $G_u = 0$ | $G_1$ | 0     | 1 | 0     |
|           | 0     | 1     | 0 | 0     |
|           | 1     | 0     | 0 | 0     |
| $G_u = 1$ | $G_1$ | 0     | 0 | $1/2$ |
|           | 0     | 0     | 0 | $1/2$ |
|           | 1     | 0     | 0 | 0     |
| $G_u = 2$ | $G_1$ | 0     | 0 | 0     |
|           | 0     | 0     | 0 | 0     |
|           | 1     | 0     | 0 | 0     |
|           | 2     | 0     | 0 | 1     |

Table 11: Configuration  $(S_{u1} = 5, S_{u2} = 5, S_{12} = 2)$ , probabilities  $\Pr(G_1, G_2|G_u, S_{u12})$

|           |       | $G_2$ |       |       |
|-----------|-------|-------|-------|-------|
|           |       | 0     | 1     | 2     |
| $G_u = 0$ | $G_1$ | 0     | $q^2$ | 0     |
|           | 0     | $q^2$ | 0     | 0     |
|           | 1     | $pq$  | $pq$  | 0     |
| $G_u = 1$ | $G_1$ | 0     | 0     | 0     |
|           | 0     | 0     | 0     | 0     |
|           | 1     | 0     | 0     | 0     |
| $G_u = 2$ | $G_1$ | 0     | 0     | 0     |
|           | 0     | 0     | $q^2$ | 0     |
|           | 1     | 0     | $pq$  | $pq$  |
|           | 2     | 0     | 0     | $p^2$ |

Table 12: Configuration  $(S_{u1} = 4, S_{u2} = 3, S_{12} = 8)$ , probabilities  $\Pr(G_1, G_2|G_u, S_{u12})$

|           |       |       |   |     |
|-----------|-------|-------|---|-----|
|           |       | $G_2$ |   |     |
|           | $G_1$ | 0     | 1 | 2   |
| $G_u = 0$ | 0     | $q$   | 0 | 0   |
|           | 1     | 0     | 0 | $p$ |
|           | 2     | 0     | 0 | 0   |
| $G_u = 1$ | 0     | 0     | 0 | 0   |
|           | 1     | 0     | 0 | 0   |
|           | 2     | 0     | 0 | 0   |
| $G_u = 2$ | 0     | 0     | 0 | 0   |
|           | 1     | $q$   | 0 | 0   |
|           | 2     | 0     | 0 | $p$ |

Table 13: Configuration ( $S_{u1} = 3, S_{u2} = 2, S_{12} = 5$ ), probabilities  $\Pr(G_1, G_2|G_u, S_{u12})$

| Info  | SNP type | MAF         | genotype certainty | Number of genotypes (%) | Impute2  | Impute2 & Kinpute |
|-------|----------|-------------|--------------------|-------------------------|----------|-------------------|
| > 0.4 | shared   | > 0.02      | High               | 2911525 (59.7)          | 0.945    | <b>0.969</b>      |
| > 0.4 | shared   | > 0.02      | Low                | 469987 (9.6)            | 0.634    | <b>0.834</b>      |
| > 0.4 | shared   | $\leq 0.02$ | High               | 387932 (8.0)            | 0.869    | <b>0.931</b>      |
| > 0.4 | shared   | $\leq 0.02$ | Low                | 15460 (0.3)             | 0.640    | <b>0.902</b>      |
| > 0.4 | private  | > 0.02      | High               | 201672 (4.1)            | 0.927    | <b>0.960</b>      |
| > 0.4 | private  | > 0.02      | Low                | 31896 (0.7)             | 0.626    | <b>0.836</b>      |
| > 0.4 | private  | $\leq 0.02$ | High               | 54182 (1.1)             | 0.789    | <b>0.835</b>      |
| > 0.4 | private  | $\leq 0.02$ | Low                | 3178 (0.1)              | 0.691    | <b>0.824</b>      |
| < 0.4 | shared   | > 0.02      | High               | 235481 (4.8)            | 0.045    | <b>0.565</b>      |
| < 0.4 | shared   | > 0.02      | Low                | 106855 (2.2)            | 0.398    | <b>0.846</b>      |
| < 0.4 | shared   | $\leq 0.02$ | High               | 284529 (5.8)            | 0.000362 | <b>0.443</b>      |
| < 0.4 | shared   | $\leq 0.02$ | Low                | 8751 (0.2)              | 0.0473   | <b>0.873</b>      |
| < 0.4 | private  | > 0.02      | High               | 28684 (0.6)             | 0.0240   | <b>0.671</b>      |
| < 0.4 | private  | > 0.02      | Low                | 7988 (0.2)              | 0.308    | <b>0.890</b>      |
| < 0.4 | private  | $\leq 0.02$ | High               | 123111 (2.5)            | 0.00295  | <b>0.158</b>      |
| < 0.4 | private  | $\leq 0.02$ | Low                | 5913 (0.1)              | 0.0843   | <b>0.654</b>      |

Table 14: Heterozygote sensitivity

| Info  | SNP type | MAF         | genotype certainty | Number of genotypes (%) | Impute2      | Impute2 & Kinpute |
|-------|----------|-------------|--------------------|-------------------------|--------------|-------------------|
| > 0.4 | shared   | > 0.02      | High               | 2911525 (59.7)          | <b>0.953</b> | 0.950             |
| > 0.4 | shared   | > 0.02      | Low                | 469987 (9.6)            | 0.590        | <b>0.766</b>      |
| > 0.4 | shared   | $\leq$ 0.02 | High               | 387932 (8.0)            | 0.961        | <b>0.965</b>      |
| > 0.4 | shared   | $\leq$ 0.02 | Low                | 15460 (0.3)             | 0.758        | <b>0.909</b>      |
| > 0.4 | private  | > 0.02      | High               | 201672 (4.1)            | <b>0.934</b> | 0.932             |
| > 0.4 | private  | > 0.02      | Low                | 31896 (0.7)             | 0.579        | <b>0.752</b>      |
| > 0.4 | private  | $\leq$ 0.02 | High               | 54182 (1.1)             | 0.670        | <b>0.755</b>      |
| > 0.4 | private  | $\leq$ 0.02 | Low                | 3178 (0.1)              | 0.330        | <b>0.630</b>      |
| < 0.4 | shared   | > 0.02      | High               | 235481 (4.8)            | 0.531        | <b>0.761</b>      |
| < 0.4 | shared   | > 0.02      | Low                | 106855 (2.2)            | 0.437        | <b>0.741</b>      |
| < 0.4 | shared   | $\leq$ 0.02 | High               | 284529 (5.8)            | 0.429        | <b>0.923</b>      |
| < 0.4 | shared   | $\leq$ 0.02 | Low                | 8751 (0.2)              | 0.502        | <b>0.892</b>      |
| < 0.4 | private  | > 0.02      | High               | 28684 (0.6)             | 0.493        | <b>0.844</b>      |
| < 0.4 | private  | > 0.02      | Low                | 7988 (0.2)              | 0.404        | <b>0.733</b>      |
| < 0.4 | private  | $\leq$ 0.02 | High               | 123111 (2.5)            | 0.211        | <b>0.585</b>      |
| < 0.4 | private  | $\leq$ 0.02 | Low                | 5913 (0.1)              | 0.109        | <b>0.391</b>      |

Table 15: Heterozygote positive predictive value

| Info  | SNP type | MAF         | genotype<br>certainty | Number of<br>genotypes (%) | Impute2      | Impute2 &<br>Kinpute |
|-------|----------|-------------|-----------------------|----------------------------|--------------|----------------------|
| > 0.4 | shared   | > 0.02      | High                  | 2911525 (59.7)             | 0.964        | <b>0.972</b>         |
| > 0.4 | shared   | > 0.02      | Low                   | 469987 (9.6)               | 0.611        | <b>0.810</b>         |
| > 0.4 | shared   | $\leq$ 0.02 | High                  | 387932 (8.0)               | 0.987        | <b>0.992</b>         |
| > 0.4 | shared   | $\leq$ 0.02 | Low                   | 15460 (0.3)                | 0.661        | <b>0.888</b>         |
| > 0.4 | private  | > 0.02      | High                  | 201672 (4.1)               | 0.966        | <b>0.973</b>         |
| > 0.4 | private  | > 0.02      | Low                   | 31896 (0.7)                | 0.631        | <b>0.810</b>         |
| > 0.4 | private  | $\leq$ 0.02 | High                  | 54182 (1.1)                | 0.983        | <b>0.987</b>         |
| > 0.4 | private  | $\leq$ 0.02 | Low                   | 3178 (0.1)                 | 0.682        | <b>0.879</b>         |
| < 0.4 | shared   | > 0.02      | High                  | 235481 (4.8)               | 0.933        | <b>0.961</b>         |
| < 0.4 | shared   | > 0.02      | Low                   | 106855 (2.2)               | 0.569        | <b>0.838</b>         |
| < 0.4 | shared   | $\leq$ 0.02 | High                  | 284529 (5.8)               | 0.970        | <b>0.982</b>         |
| < 0.4 | shared   | $\leq$ 0.02 | Low                   | 8751 (0.2)                 | 0.612        | <b>0.912</b>         |
| < 0.4 | private  | > 0.02      | High                  | 28684 (0.6)                | 0.945        | <b>0.975</b>         |
| < 0.4 | private  | > 0.02      | Low                   | 7988 (0.2)                 | 0.615        | <b>0.862</b>         |
| < 0.4 | private  | $\leq$ 0.02 | High                  | 123111 (2.5)               | <b>0.989</b> | <b>0.989</b>         |
| < 0.4 | private  | $\leq$ 0.02 | Low                   | 5913 (0.1)                 | 0.901        | <b>0.919</b>         |

Table 16: Concordance rates
